# Supplementary material for: T2Bacteria and T2Resistance Assays in Critically Ill Patients with Sepsis or Septic Shock: A Descriptive Experience
Source: MDPI journal article supplement (doi:10.3390/antibiotics11121823), 2022-12-15
Supplement: s1 [file s1]

**Supplementary table S1. Demographic and clinical characteristics of 33 critically ill patients tested with T2Bacteria and T2Resistance assays**

| Variable                                            | Total of patients <sup>a</sup><br>33 (100) |
|-----------------------------------------------------|--------------------------------------------|
| <b>Demographic variables</b>                        |                                            |
| Age in years, median (IQR)                          | 62 (47-71)                                 |
| Male gender                                         | 18 (55)                                    |
| <b>Comorbidities</b>                                |                                            |
| COVID-19                                            | 17 (52)                                    |
| Hematological malignancy                            | 2 (6)                                      |
| Solid neoplasm                                      | 2 (6)                                      |
| <b>Variables at time of T2 testing <sup>b</sup></b> |                                            |
| C-reactive protein in mg/L, median (IQR)            | 128.5 (57.4-166)                           |
| Procalcitonin in ng/mL, median (IQR)                | 1.11 (0.42-9.26)                           |
| Neutropenia (ANC < 500 cell/mm <sup>3</sup> )       | 1 (3)                                      |
| Septic shock                                        | 21 (55)                                    |
| Antibiotic therapy                                  | 6 (16)                                     |

ANC, absolute neutrophil count; COVID-19, coronavirus disease 2019; IQR, interquartile range.

<sup>a</sup> Results are presented as No. of patients (%) unless otherwise indicated.

<sup>b</sup> Calculated for a denominator of 38 episodes occurring in 33 patients

<sup>c</sup> Already initiated from at least 24 hours at the time of T2 testing
